# Supplementary material
Source: PubMed Central journal article supplement (PMC8592388)
Supplement: NIHMS1688438-supplement-Supp1.pdf [file NIHMS1688438-supplement-Supp1.pdf]

**Supplementary Table 1: Comparison of disability and outcome in attacks of MOGAD, AQP-4-IgG-NMOSD, and MS involving the brainstem, cerebellum or both**

| <b>Clinical outcomes</b>                      | MOGAD brainstem or cerebellar attack (n=39) | AQP4-IgG NMOSD brainstem or cerebellar attack (n=30) | MOGAD vs AQP4-IgG-NMOSD <i>P</i> -value <sup>a</sup> | MS brainstem or cerebellar attack (n=30) <sup>a</sup> | MOGAD vs MS <i>P</i> -value <sup>b</sup> |
|-----------------------------------------------|---------------------------------------------|------------------------------------------------------|------------------------------------------------------|-------------------------------------------------------|------------------------------------------|
| Median EDSS at attack nadir (range)           | 7 (0 – 9) <sup>c</sup>                      | 6.5 (0 – 10) <sup>e</sup>                            | .55                                                  | 3 (0 – 3.5) <sup>f</sup>                              | .08                                      |
| Median Brainstem FSS at attack nadir (range)  | 2 (0 – 5) <sup>c</sup>                      | 2 (0 – 5) <sup>e</sup>                               | .94                                                  | 3 (0 – 3) <sup>f</sup>                                | .80                                      |
| Median Cerebellar FSS at attack nadir (range) | 0 (0 – 2) <sup>d</sup>                      | 0.5 (0 – 4) <sup>f</sup>                             | .87                                                  | 1 (0 – 2) <sup>f</sup>                                | .56                                      |
| Median EDSS at recovery (range)               | 0 (0 – 9) <sup>g</sup>                      | 1 (0 – 10) <sup>i</sup>                              | .35                                                  | 1 (0 – 3.5) <sup>g</sup>                              | .22                                      |
| Median Brainstem FSS at recovery (range)      | 0 (0 – 4) <sup>g</sup>                      | 0 (0 – 5) <sup>i</sup>                               | .41                                                  | 0 (0 – 3) <sup>g</sup>                                | .60                                      |
| Median Cerebellar FSS at recovery (range)     | 0 (0 – 2) <sup>h</sup>                      | 0 (0 – 1) <sup>d</sup>                               | .67                                                  | 0 (0 – 3) <sup>g</sup>                                | .12                                      |
| Median duration of follow up, months (range)  | 21 (3 – 121)                                | 70 (6 – 334)                                         | .002                                                 | 42 (1 – 189)                                          | .03                                      |

Key: AQP4, aquaporin-4; EDSS, expanded disability status scale; FSS, functional systems score;

MOG, myelin oligodendrocyte glycoprotein; MS, multiple sclerosis.

<sup>a</sup> statistical comparison between MOG IgG and AQP4 IgG cases,

<sup>b</sup> statistical comparison between MOG IgG and MS cases,

<sup>c</sup> median and range data based on 13 patients with information available,

<sup>d</sup> median and range data based on 11 patients with information available,

<sup>e</sup> median and range data based on 9 patients with information available,

<sup>f</sup> median and range data based on 8 patients with information available,

<sup>g</sup> median and range data based on 17 patients with information available,

<sup>h</sup> median and range data based on 16 patients with information available,

<sup>i</sup> median and range data based on 12 patients with information available.
